# Supplementary material for: One-year clinical efficacy and safety of indigo naturalis for active ulcerative colitis: a real-world prospective study
Source: PubMed Central journal article supplement — Intest Res. 2022 Apr 29;20(2):260–8. doi: 10.5217/ir.2021.00124 (PMC9081999; doi:10.5217/ir.2021.00124), 2022-04-29
Supplement: ir-2021-00124-suppl4.pdf [file ir-2021-00124-suppl4.pdf]

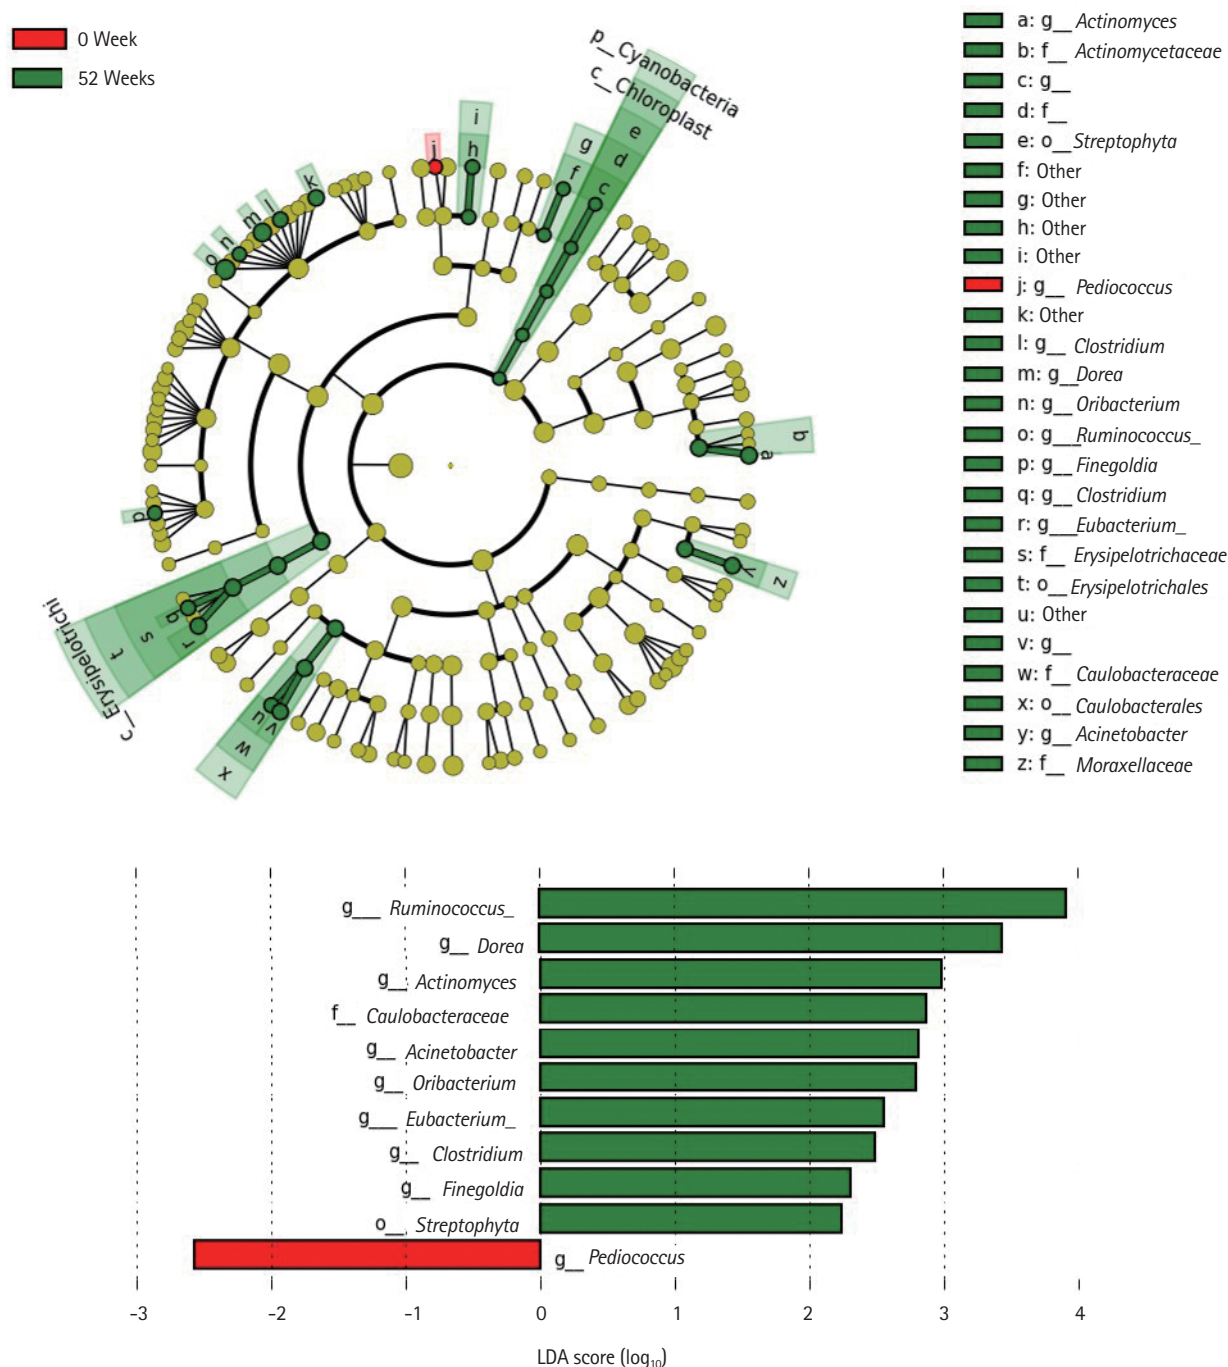

**Supplementary Fig. 3.** Comparison of the taxonomic composition between before and after indigo naturalis indigo naturalis (IN) treatment. The abundance of genera *Ruminococcus*, *Dorea*, *Actinomyces*, *Oribacterium*, *Eubacterium*, *Clostridium*, and *Finegoldia*, the family *Caulobacteraceae*, and the order *Streptophyta* were significantly greater, and the abundance of genus *Pediococcus* was significantly lower, in mucosal samples after IN treatment compared with before IN treatment. LDA, linear discriminant analysis.
